# Supplementary material
Source: PubMed Central journal article supplement (PMC7872792)
Supplement: NIHMS1595137-supplement-1.pdf [file NIHMS1595137-supplement-1.pdf]

### Published datasets searched for TNF analysis

| <b>Organism</b>      | <b>Genomes/Transcriptomes</b> | <b>Date Published</b> |
|----------------------|-------------------------------|-----------------------|
| <b>Mammals</b>       | Human                         | 2001                  |
|                      | Mouse                         | 2002                  |
| <b>Aves</b>          | Zebra Finch                   | 2010                  |
|                      | Chicken                       | 2004                  |
|                      | Turkey                        | 2011                  |
|                      | Mallard Duck                  | 2013                  |
| <b>Reptile</b>       | Western Painted Turtle        | 2013                  |
|                      | American Alligator            | 2012                  |
|                      | Chinese Alligator             | 2013                  |
| <b>Amphibian</b>     | Western Clawed Frog           | 2010                  |
|                      | North American Bullfrog       | 2017                  |
|                      | High Himalaya Frog            | 2015                  |
| <b>Sarcopterygii</b> | Coelacanth                    | 2013                  |
|                      | West African Lungfish         | 2013                  |
|                      | South American Lungfish       | 2015                  |
| <b>Salmonids</b>     | Rainbow Trout                 | 2014                  |
|                      | Salmon                        | 2016                  |
|                      | Coho Salmon                   | 2017                  |

**Supplementary Table I.** Comprehensive list of genomes analyzed for the presence of TNFSF members in this study.

### Statistical analysis of assembled transcriptomes

| Transcriptome Statistics  | Mouse Peyer's patch | Mouse skin          | Trout interbranchial lymphoid tissue | Trout Muscle               | Turkey cecal tonsil        | Turkey muscle              | Lungfish lymphoid aggregate | Lungfish skin             |
|---------------------------|---------------------|---------------------|--------------------------------------|----------------------------|----------------------------|----------------------------|-----------------------------|---------------------------|
| Organism                  | <i>Mus musculus</i> | <i>Mus musculus</i> | <i>Oncorhynchus mykiss</i>           | <i>Oncorhynchus mykiss</i> | <i>Meleagris gallopavo</i> | <i>Meleagris gallopavo</i> | <i>Protopterus dolloi</i>   | <i>Protopterus dolloi</i> |
| Accession Numbers         | SRR8114138          | SRR6884615          | SRR8112130                           | DRR046645                  | SRR7771850                 | SRR478418                  | SRR7879313                  | SRR8137461                |
| Raw total sequences       | 68,691,990          | 57,486,984          | 31,379,578                           | 157,592,662                | 37,217,902                 | 25,983,202                 | 57,607,080                  | 37,794,958                |
| Reads mapped and paired   | 67,068,330          | 56,347,246          | 29,359,424                           | 148,341,764                | 35,589,842                 | 24,619,708                 | 56,232,156                  | 36,707,530                |
| % Reads mapped and paired | 97.64%              | 98.02%              | 93.56%                               | 94.13%                     | 95.63%                     | 94.72%                     | 97.61%                      | 97.12%                    |
| Reads unmapped            | 1,278,627           | 889,825             | 1,587,745                            | 6,703,289                  | 1,255,693                  | 1,085,299                  | 1,088,166                   | 845,117                   |
| n_scaffolds               | 280,740             | 246,275             | 286,901                              | 176,993                    | 164,478                    | 247,098                    | 162,353                     | 128,529                   |
| scaf_bp                   | 201,556,902         | 306,900,459         | 212,361,256                          | 110,893,564                | 176,631,903                | 163,148,464                | 114,958,573                 | 101,050,590               |
| scaf_N50                  | 38,844              | 32,520              | 43,533                               | 36,610                     | 20,275                     | 30,971                     | 21,735                      | 16,845                    |
| scaf_L50                  | 1,265               | 2,778               | 1,336                                | 882                        | 2,521                      | 1,275                      | 1,398                       | 1,468                     |
| scaf_N90                  | 196,215             | 142,164             | 198,077                              | 129,778                    | 97,765                     | 175,721                    | 112,489                     | 87,167                    |
| scaf_L90                  | 280                 | 425                 | 283                                  | 274                        | 349                        | 250                        | 258                         | 295                       |
| scaf_max                  | 16,461              | 35,601              | 15,868                               | 9,880                      | 18,221                     | 18,940                     | 10,356                      | 47,530                    |
| gc_avg                    | 0.46728             | 0.49312             | 0.45933                              | 0.47307                    | 0.4534                     | 0.44589                    | 0.39734                     | 0.40296                   |
| gc_std                    | 0.07262             | 0.07403             | 0.06972                              | 0.0802                     | 0.09034                    | 0.09161                    | 0.05759                     | 0.05204                   |

**Supplementary Table II.** Statistical analysis of assembled transcriptomes.

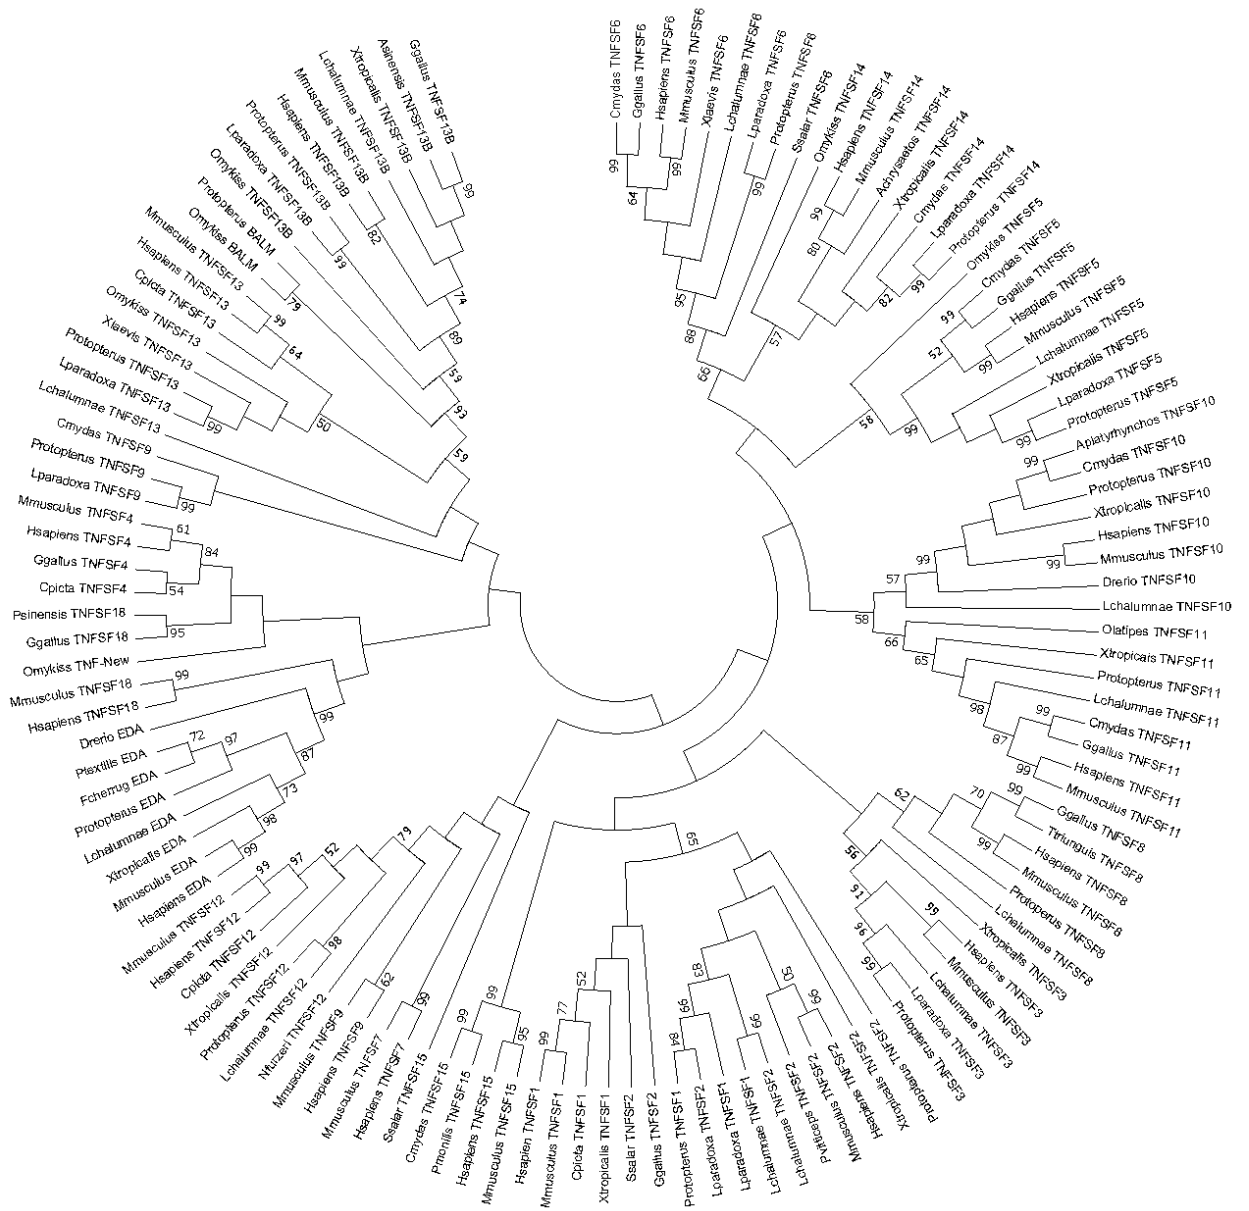

**Supplementary Figure 1.** Phylogenetic tree showing the evolutionary relationship of vertebrate TNFSF proteins. The analysis was performed on homologous sequences aligned with Muscle using MEGA 10 software (Kumar et al. 2018). The evolutionary distances were computed using a Poisson substitution model and the tree was constructed with the Neighbor-Joining method. Tree was bootstrapped 1000 times. Value lower than 50% were removed from the tree. Note that Lparadoxa TNFSF10, Lchalumnae TNFSF14 and Drerio TNFSF18 are not included in the phylogenetic tree. Species in the tree are abbreviated as follows: Hsapiens: human (Hs); Mmusculus: mouse (Mm); Ggallus: chicken (Gg); Aplatyrynchos: mallard duck (Ap); Fcherrug: saker falcon (Fc); Pmonilis: band-tailed pigeon (Pm); Asinensis: Chinese alligator (As); Pvitticeps: bearded dragon (Pv); Triunguis: turtle; Cmydas: sea turtle (Cm); Psinensis: Chinese soft shelled turtle (Ps); Cpicta: painted turtle (Cp); Ptextilis: brown snake (Pt); Achrysaetos: golden eagle (Ac); Xtropicalis: Western clawed frog (Xt); Xlaevis: African clawed frog (XI); Protopterus: African lungfish; Lchalumnae: coelacanth (Lc); Lparadoxa: South American lungfish (Lp); Omykiss: rainbow trout (Om); Ssalar: salmon (Ss); Drerio: zebrafish (Dr); Olatipes: Japanese rice fish (Ol); Nfurzeri: killifish (Nf).

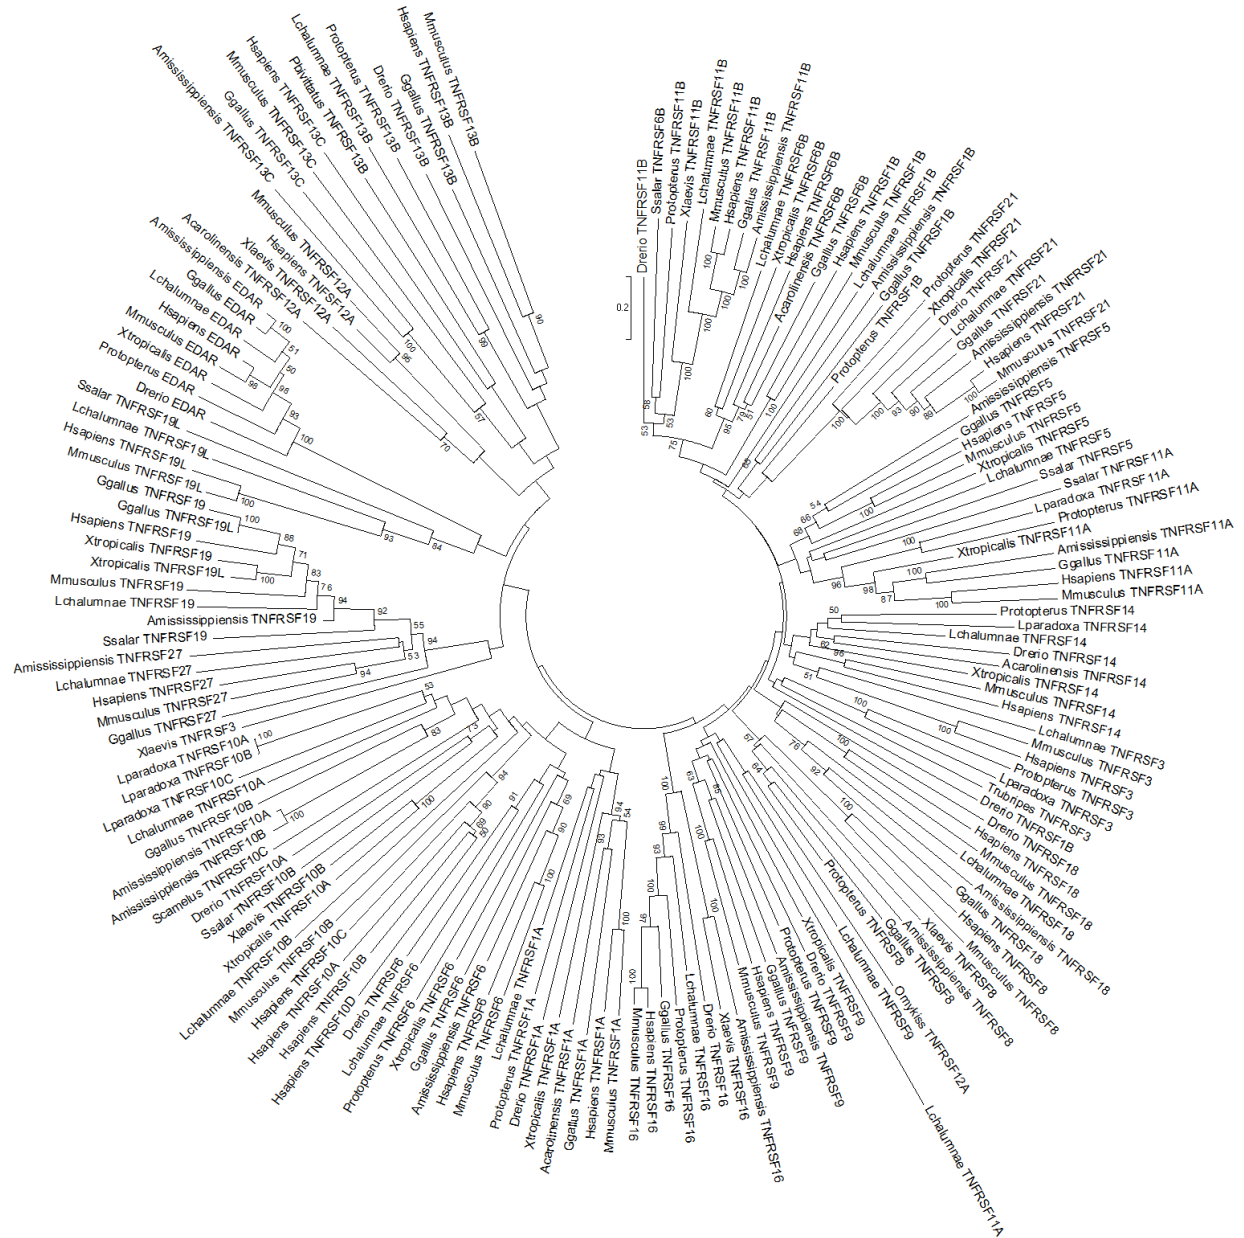

**Supplementary Figure 2.** Phylogenetic tree showing the evolutionary relationship of vertebrate TNFRSF proteins. The analysis was performed on homologous sequences aligned with Muscle using MEGA 10 software (Kumar et al. 2018). The evolutionary distances were computed using a Poisson substitution model and the tree was constructed with the Neighbor-Joining method. Tree was bootstrapped 1000 times. Value lower than 50% were removed from the tree. Note that TNFRSF 4, 7, 25, 17 are not included in the phylogenetic tree for clarity purposes. Species in the tree are abbreviated as follows: Hsapiens: human (Hs); Mmusculus: mouse (Mm); Ggallus: chicken (Gg); Scamelus australis: Wild ostrich (Sca); Xtropicalis or Xlaevis: frog (Xt or Xl); Protopterus: African lungfish; Acarolinensins: lizard (Ac); Amississippiensis: alligator (Am); Pbivittatus: python (Pb); Lchalumnae: coelacanth (Lc); Lparadoxa: South American lungfish (Lp); Drerio: zebrafish (Dr); Ssalar: salmon (Ss); Fheteroclitus: mummichog killifish (Fh); Omykiss: rainbow trout (Om).
